# Supplementary material
Source: PubMed Central journal article supplement (PMC7939714)
Supplement: Dambha-Miller_Supp_Apps.pdf [file Dambha-Miller_Supp_Apps.pdf]

### Supplemental materials for

Dambha-Miller H, Griffin SJ, Young D, et al. The use of primary care big data in understanding the pharmacoepidemiology of COVID-19: a consensus statement from the COVID-19 Primary Care Database Consortium. *Ann Fam Med.* 2021;19(2):135-140.

### Supplemental Appendix 1

Angiotensin Converting Enzyme-Inhibitors including:

|                                      |
|--------------------------------------|
| Captopril                            |
| Enalapril maleate                    |
| Enalapril with hydrochlorothiazide   |
| Fosinopril sodium                    |
| Imidapril hydrochloride              |
| Lisinopril                           |
| Lisinopril with hydrochlorothiazide  |
| Perindopril arginine                 |
| Perindopril arginine with indapamide |
| Perindopril erbumine                 |
| Quinapril                            |
| Quinapril with hydrochlorothiazide   |
| Ramipril                             |
| Ramipril with felodipine             |
| Trandolapril                         |

Angiotensin Receptor Blocker and combinations including:

|                                                    |
|----------------------------------------------------|
| Amlodipine with valsartan                          |
| Azilsartan medoxomil                               |
| Candesartan cilexetil                              |
| Eprosartan                                         |
| Irbesartan                                         |
| Irbesartan with hydrochlorothiazide                |
| Losartan potassium                                 |
| Losartan with hydrochlorothiazide                  |
| Olmesartan medoxomil                               |
| Olmesartan with amlodipine                         |
| Olmesartan with amlodipine and hydrochlorothiazide |

|                                      |
|--------------------------------------|
| Olmesartan with hydrochlorothiazide  |
| Sacubitril with valsartan            |
| Telmisartan                          |
| Telmisartan with hydrochlorothiazide |
| Valsartan                            |
| Valsartan with hydrochlorothiazide   |

Non-steroidal Anti-inflammatory Drugs including:

|                                    |
|------------------------------------|
| Aceclofenac                        |
| Aspirin                            |
| Aspirin with codeine               |
| Aspirin with metoclopramide        |
| Benzydamine hydrochloride          |
| Bromfenac                          |
| Celecoxib                          |
| Dexibuprofen                       |
| Dexketoprofen                      |
| Diclofenac                         |
| Diclofenac potassium               |
| Diclofenac sodium                  |
| Diclofenac sodium with misoprostol |
| Etodolac                           |
| Etoricoxib                         |
| Felbinac                           |
| Flurbiprofen                       |
| Ibuprofen                          |
| Indometacin                        |
| Ketoprofen                         |
| Ketorolac trometamol               |
| Mefenamic acid                     |
| Meloxicam                          |
| Nabumetone                         |
| Naproxen                           |
| Naproxen with esomeprazole         |

|                             |
|-----------------------------|
| Nepafenac                   |
| Parecoxib                   |
| Piroxicam                   |
| Sulindac                    |
| Tenoxicam                   |
| Tiaprofenic acid            |
| Tolfenamic acid             |
| Tramadol with dexketoprofen |

Chloroquines including:

|                            |
|----------------------------|
| Chloroquine                |
| Hydroxychloroquine sulfate |
| Quinine                    |

Thiazolidinediones and their combinations including:

|                             |
|-----------------------------|
| Pioglitazone with metformin |
| Pioglitazone                |

Metformin and its combinations including:

|                              |
|------------------------------|
| Alogliptin with metformin    |
| Canagliflozin with metformin |
| Dapagliflozin with metformin |
| Empagliflozin with metformin |
| Linagliptin with metformin   |
| Metformin hydrochloride      |
| Saxagliptin with metformin   |
| Sitagliptin with metformin   |
| Vildagliptin with metformin  |

Sulphonylureas including:

|               |
|---------------|
| Glibenclamide |
| Gliclazide    |
| Glimepiride   |
| Glipizide     |
| Tolbutamide   |

Insulin including:

|                                    |
|------------------------------------|
| Insulin aspart                     |
| Insulin glulisine                  |
| Insulin lispro                     |
| Insulin degludec with liraglutide  |
| Insulin detemir                    |
| Insulin glargine                   |
| Insulin glargine with lixisenatide |
| Protamine zinc insulin             |
| Biphasic isophane insulin          |
| Biphasic insulin aspart            |
| Biphasic insulin lispro            |
| Insulin degludec                   |
| Isophane insulin                   |

Sodium glucose co-transporter 2 inhibitors and combinations including:

|                                |
|--------------------------------|
| Canagliflozin                  |
| Canagliflozin with metformin   |
| Dapagliflozin                  |
| Dapagliflozin with metformin   |
| Empagliflozin                  |
| Empagliflozin with linagliptin |
| Empagliflozin with metformin   |
| Ertugliflozin                  |
| Saxagliptin with dapagliflozin |

Gliptans and its combinations including:

|                                |
|--------------------------------|
| Alogliptin                     |
| Alogliptin with metformin      |
| Empagliflozin with linagliptin |
| Linagliptin                    |
| Linagliptin with metformin     |
| Saxagliptin                    |
| Saxagliptin with dapagliflozin |
| Saxagliptin with metformin     |
| Sitagliptin                    |
| Sitagliptin with metformin     |

|                             |
|-----------------------------|
| Vildagliptin                |
| Vildagliptin with metformin |

Glucagon-like peptide-1 receptor agonists and combinations including:

|                                    |
|------------------------------------|
| Dulaglutide                        |
| Exenatide                          |
| Insulin glargine with lixisenatide |
| Liraglutide                        |
| Lixisenatide                       |
| Semaglutide                        |

Meglitinides including:

|             |
|-------------|
| Nateglinide |
| Repaglinide |

Protease inhibitors including:

|                                                                    |
|--------------------------------------------------------------------|
| Atazanavir                                                         |
| Atazanavir with cobicistat                                         |
| Darunavir                                                          |
| Darunavir with cobicistat                                          |
| Darunavir with cobicistat, emtricitabine and tenofovir alafenamide |
| Fosamprenavir                                                      |
| Lopinavir with ritonavir                                           |
| Ombitasvir with paritaprevir and ritonavir                         |
| Ritonavir                                                          |
| Saquinavir                                                         |
| Tipranavir                                                         |

TNF inhibitors including:

|                    |
|--------------------|
| Adalimumab         |
| Certolizumab pegol |
| Etanercept         |
| Golimumab          |

|            |
|------------|
| Infliximab |
|------------|

Oral steroids including:

|                         |
|-------------------------|
| Deflazacort             |
| Dexamethasone           |
| Fludrocortisone acetate |
| Hydrocortisone          |
| Prednisolone            |

Inhaled and nasal steroids including:

|                                                  |
|--------------------------------------------------|
| Beclometasone dipropionate                       |
| Beclometasone with formoterol                    |
| Beclometasone with formoterol and glycopyrronium |
| Betamethasone                                    |
| Budesonide                                       |
| Budesonide with formoterol                       |
| Ciclesonide                                      |
| Fluticasone with azelastine                      |
| Fluticasone with formoterol                      |
| Fluticasone with salmeterol                      |
| Fluticasone with umeclidinium and vilanterol     |
| Fluticasone with vilanterol                      |
| Mometasone furoate                               |
| Triamcinolone acetonide                          |

Other immune modulators including:

|                       |
|-----------------------|
| Allopurinol           |
| Azathioprine          |
| Ciclosporin           |
| Cyclophosphamide      |
| Mercaptopurine        |
| Methotrexate          |
| Mycophenolate mofetil |
| Pimecrolimus          |
| Sirolimus             |

|            |
|------------|
| Tacrolimus |
|------------|

Monoclonal antibodies including:

|                       |
|-----------------------|
| Atezolizumab          |
| Avelumab              |
| Benralizumab          |
| Bevacizumab           |
| Brentuximab vedotin   |
| Canakinumab           |
| Cemiplimab            |
| Cetuximab             |
| Daratumumab           |
| Dinutuximab beta      |
| Durvalumab            |
| Elotuzumab            |
| Gemtuzumab ozogamicin |
| Inotuzumab ozogamicin |
| Ipilimumab            |
| Mepolizumab           |
| Necitumumab           |
| Nivolumab             |
| Obinutuzumab          |
| Omalizumab            |
| Palivizumab           |
| Panitumumab           |
| Pembrolizumab         |
| Pertuzumab            |
| Ramucirumab           |
| Reslizumab            |
| Rituximab             |
| Siltuximab            |
| Trastuzumab           |
| Trastuzumab emtansine |
| Basiliximab           |

Cytokine-neutralising monoclonal antibodies including:

|          |
|----------|
| Anakinra |
|----------|

|               |
|---------------|
| Brodalumab    |
| Dupilumab     |
| Guselkumab    |
| Ixekizumab    |
| Risankizumab  |
| Sarilumab     |
| Secukinumab   |
| Tildrakizumab |
| Tocilizumab   |
| Ustekinumab   |

Anti-lymphocyte monoclonal antibodies:

|             |
|-------------|
| Alemtuzumab |
| Basiliximab |
| Belimumab   |
| Natalizumab |
| Ocrelizumab |
| Vedolizumab |

Janus kinase inhibitors including:

|              |
|--------------|
| Baricitinib  |
| Tofacitinib  |
| Upadacitinib |

Proton pump inhibitors including:

|                            |
|----------------------------|
| Esomeprazole               |
| Lansoprazole               |
| Naproxen with esomeprazole |
| Omeprazole                 |
| Pantoprazole               |
| Rabeprazole sodium         |

Statins including:

|              |
|--------------|
| Atorvastatin |
| Fluvastatin  |
| Rosuvastatin |

|                              |
|------------------------------|
| Simvastatin                  |
| Simvastatin with ezetimibe   |
| Simvastatin with fenofibrate |
| Pravastatin sodium           |

Anti-platelets including:

|                           |
|---------------------------|
| Aspirin                   |
| Cilostazol                |
| Clopidogrel               |
| Dipyridamole              |
| Dipyridamole with aspirin |
| Prasugrel                 |
| Selexipag                 |
| Ticagrelor                |

Oral anticoagulants including:

|                 |
|-----------------|
| Acenocoumarol   |
| Apixaban        |
| Edoxaban        |
| Phenindione     |
| Rivaroxaban     |
| Warfarin sodium |

Calcium channel blockers including:

|                                                    |
|----------------------------------------------------|
| Amlodipine                                         |
| Amlodipine with valsartan                          |
| Atenolol with nifedipine                           |
| Diltiazem hydrochloride                            |
| Felodipine                                         |
| Lacidipine                                         |
| Lercanidipine hydrochloride                        |
| Nicardipine hydrochloride                          |
| Nifedipine                                         |
| Olmesartan with amlodipine                         |
| Olmesartan with amlodipine and hydrochlorothiazide |

|                          |
|--------------------------|
| Ramipril with felodipine |
|--------------------------|

|                         |
|-------------------------|
| Verapamil hydrochloride |
|-------------------------|

## Supplemental Appendix 2

Sociodemographic variables:

|                               |
|-------------------------------|
| Age                           |
| Sex                           |
| Ethnicity                     |
| Index of Multiple Deprivation |
| Geographical Location         |
| Smoking status                |
| Alcohol intake                |
| Body mass index               |

Co-morbidities:

|                            |
|----------------------------|
| COPD                       |
| Asthma                     |
| Cystic Fibrosis            |
| Rheumatoid arthritis       |
| Ankylosing spondylitis     |
| Inflammatory bowel disease |
| Diabetes Mellitus          |
| Hypertension               |
| Cardiovascular Disease     |
| Chronic Liver Disease      |
| Chronic Kidney Disease     |
| Epilepsy                   |
| Severe mental illness      |
| Dementia                   |

|                      |
|----------------------|
| Parkinson's disease  |
| Vitamin D Deficiency |

Social care variables:

|                                                    |
|----------------------------------------------------|
| Frailty score, e.g. Electronic Frailty Index (eFI) |
| Falls                                              |
| Care Home/Nursing Home Resident                    |
| Poor mobility bed ridden or housebound             |
